# Supplementary material for: Engineering second-generation TCR-T cells by site-specific integration of TRAF-binding motifs into the CD247 locus
Source: PubMed Central journal article supplement — J Immunother Cancer. 2023 Apr 5;11(4):e005519. doi: 10.1136/jitc-2022-005519 (PMC10083865; doi:10.1136/jitc-2022-005519), 2023-04-05
Supplement: jitc-2022-005519supp001.pdf [file jitc-2022-005519supp001.pdf]

1

2

## Supplemental material

3

### 4 **Engineering second-generation TCR-T cells by site-specific** 5 **integration of TRAF-binding motifs into the *CD247* locus**

6

7

8

9

10 **This PDF file includes:**

11 Supplemental figures 1 to 11, and table1.

## 12 **Contents**

13 Supplemental figure 1. Site-specific integration of modified-CD3 $\zeta$  constructs into the *CD247*  
14 locus.

15 Supplemental figure 2. Comparison of the expression levels of the two distinct CAR  
16 constructs, 19BBz and 19zBB.

17 Supplemental figure 3. Generation of zBB<sub>3</sub>×FLAG transduced Jurkat cells for co-  
18 immunoprecipitation.

19 Supplemental figure 4. Generation of NY-ESO-1-specific TCR-T cells and evaluation of their  
20 cytolytic potential.

21 Supplemental figure 5. Generation of BBz- or zBB-transduced CD3 $\zeta$ -KO Jurkat cells.

22 Supplemental figure 6. Analysis of CD3 $\zeta$ -KO Jurkat cells expressing zBB<sup>KtoR</sup>.

23 Supplemental figure 7. The restoration of TCR signaling by substituting serine for the  
24 arginine and lysine in the BRM.

25 Supplemental figure 8. Generation of zBB<sup>ΔBRM</sup>-transduced CD3 $\zeta$ -KO Jurkat cells.

26 Supplemental figure 9. Generation and analysis of zBB<sup>ΔBRM</sup>/1G4 T cells.

27 Supplemental figure 10. Comparison of 1G4 T cells proliferation in the co-culture with SCT-  
28 K562 feeder cells.

29 Supplemental figure 11. Individual tumor growth curves and flow cytometry gating strategy  
30 for human T cells in tumor.

31 Supplemental table 1. sgRNA sequences targeting the *CD247* locus.

32 Supplemental reference.

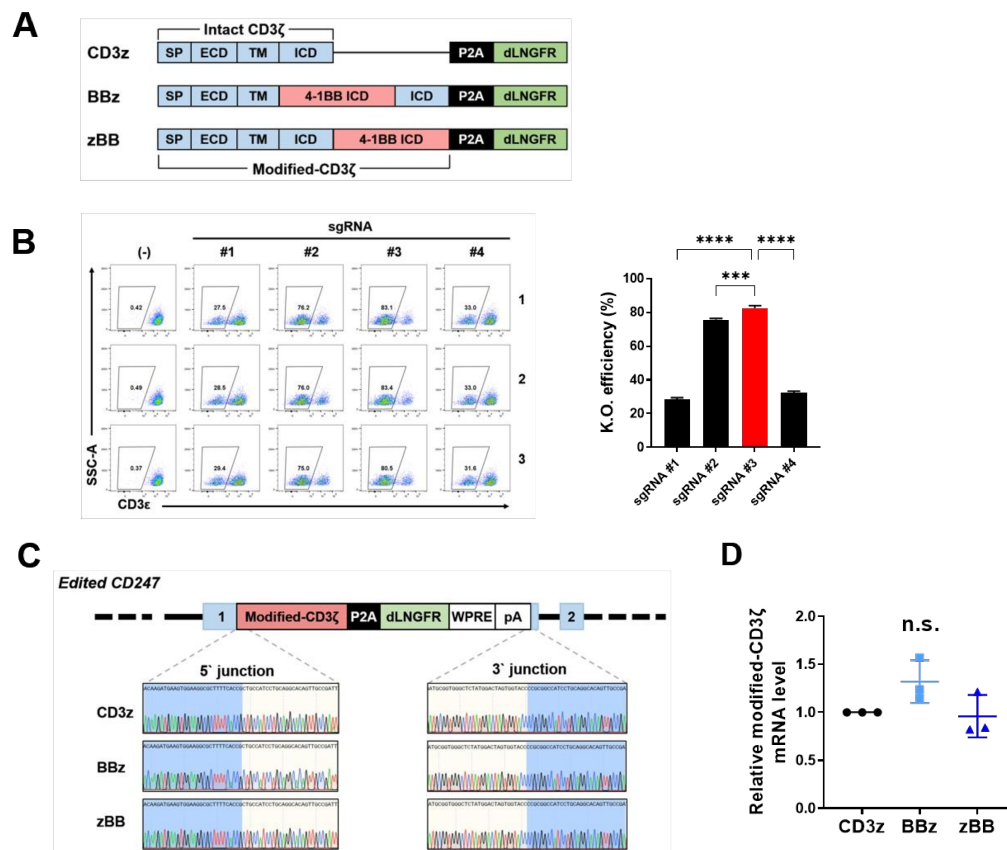

33

34 **Supplemental figure 1. Site-specific integration of modified-CD3 $\zeta$  constructs into the**  
 35 ***CD247* locus.**

36 (A) Gene schematics of the modified-CD3 $\zeta$  constructs. (B) Screening sequence of sgRNAs  
 37 targeting *CD247*. (C) In-Out PCR for targeted integration of modified-CD3 $\zeta$  at *CD247* locus.  
 38 (D) mRNA expression level of modified-CD3 $\zeta$  in CD3z-, BBz-, and zBB-KI T cells. P-values  
 39 (\*\*P < 0.01 and \*\*\*P < 0.001) were determined using one-way ANOVA, with Tukey's  
 40 multiple comparisons *post-hoc* test (B, D). Data have been presented as mean  $\pm$  SEM. n.s.,  
 41 not significant; SP, signal peptide; ECD, extracellular domain; TM, transmembrane; ICD,  
 42 intracellular domain.

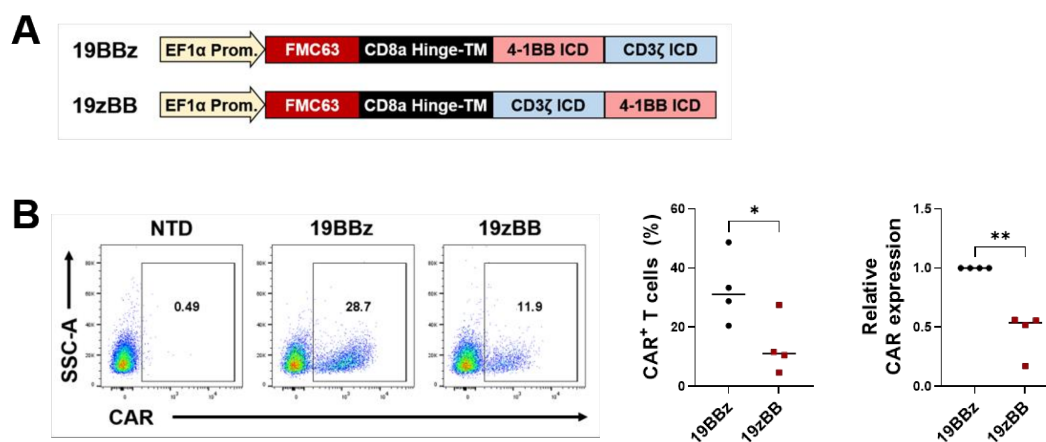

43

44 **Supplemental figure 2. Comparison of the expression levels of the two distinct CAR**  
 45 **constructs, 19BBz and 19zBB.**

46 (A) Gene schematics of CAR constructs on lentiviral vectors that were used to generate  
 47 19BBz and 19zBB CAR T cells. CD19-specific CAR used the single-chain variable  
 48 fragments from the FMC63 antibody. Hinge/transmembrane and intracellular domains are  
 49 indicated. (B) Representative flow cytometric analysis of the proportion of cells positive for  
 50 CAR in primary human T cells (left). Percent (middle) and relative mean fluorescence  
 51 intensity (MFI; right) of the indicated CARs. Two-tailed student's *t*-test was used to  
 52 determine significance (\* $P < 0.05$  and \*\* $P < 0.01$ ). Data have been presented as mean  $\pm$  SEM.

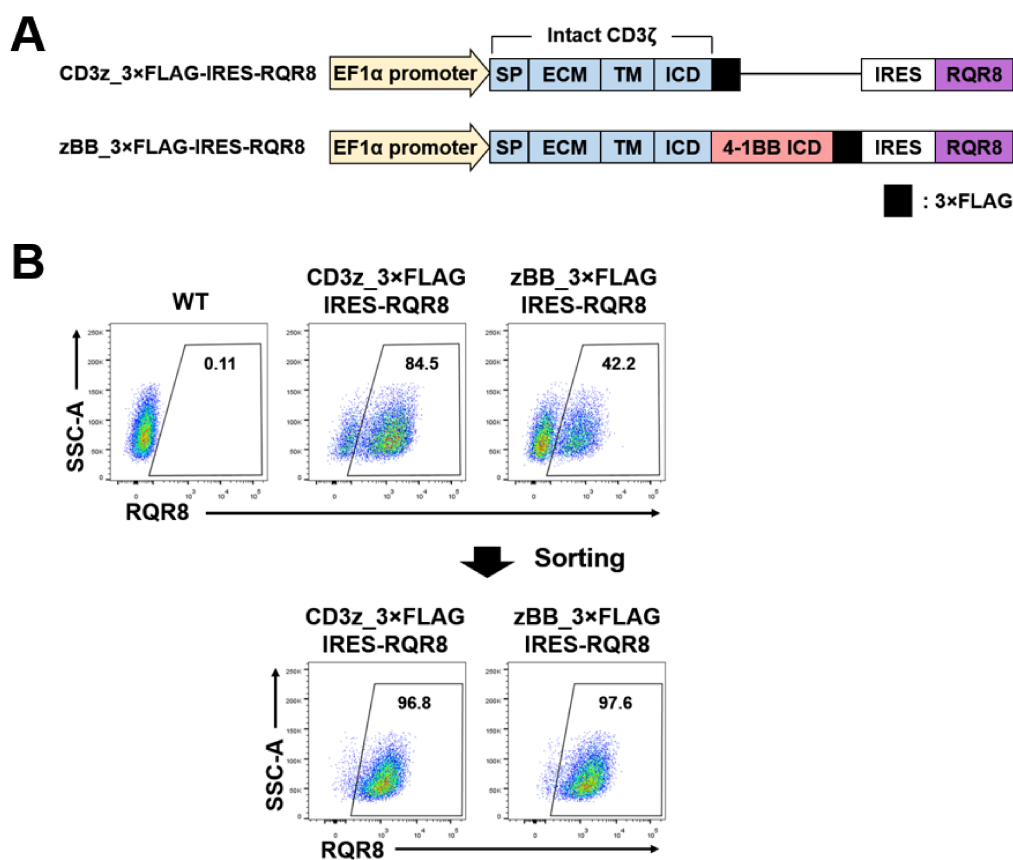

53

54 **Supplemental figure 3. Generation of zBB\_3×FLAG transduced Jurkat cells for co-**  
 55 **immunoprecipitation.**

56 (A) Gene schematics of CD3z\_3×FLAG and zBB\_3×FLAG in lentiviral vectors carrying a  
 57 bicistronic RQR8 reporter.<sup>1</sup> (B) Transduction (top) and sorting (bottom) efficiency of  
 58 CD3z\_3×FLAG- and zBB\_3×FLAG-transduced CD3ζ-KO Jurkat cells. RQR8<sup>+</sup> Jurkat cells  
 59 were isolated using anti-CD34-PE monoclonal antibodies and PE<sup>+</sup> MACS beads. SP, signal  
 60 peptide; ECD, extracellular domain; TM, transmembrane; ICD, intracellular domain.

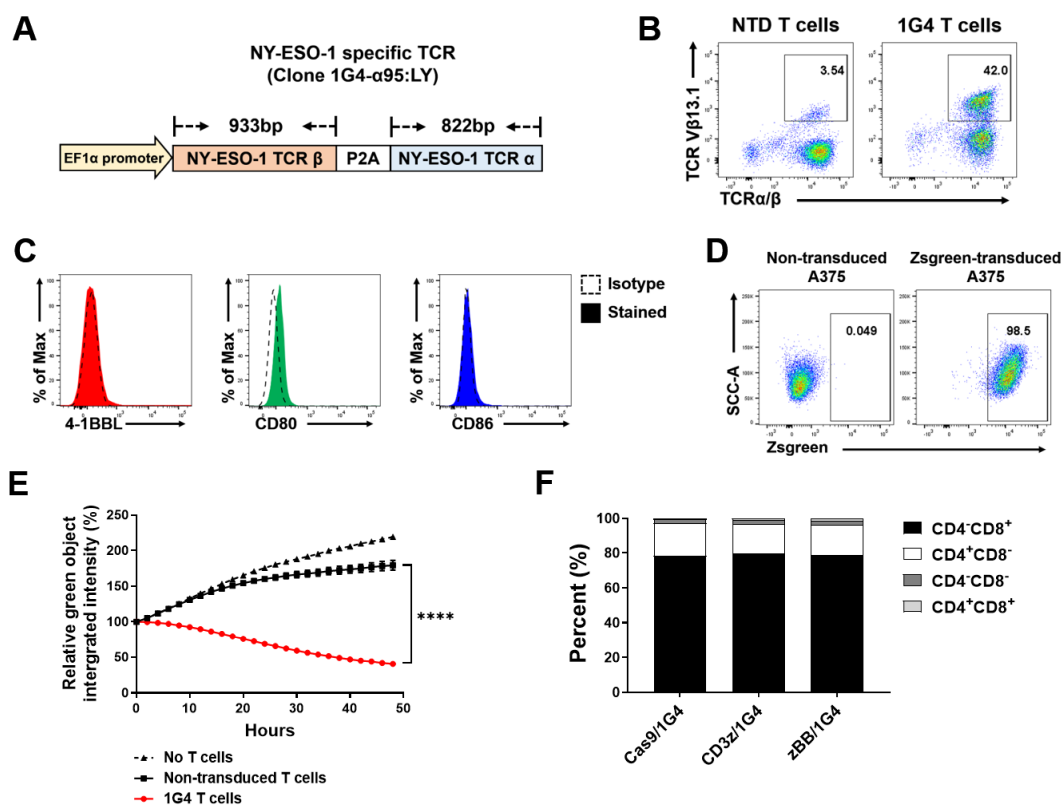

61

62 **Supplemental figure 4. Generation of NY-ESO-1-specific TCR-T cells and evaluation of**  
 63 **their cytotoxic potential.**

64 (A) Schematic diagram of NY-ESO-1-specific TCR (clone 1G4- $\alpha$ 95:LY). A P2A peptide  
 65 enables co-expression of TCR $\beta$  and TCR $\alpha$  under the EF1 $\alpha$  promoter. (B) Percentage of TCR  
 66 V $\beta$ 13.1 in NTD and 1G4 T cells. (C) Expression of co-stimulatory ligands, CD80, CD86, and  
 67 4-1BBL, in A375 cells. (D) Proportion of Zsgreen in non (left panel)- and Zsgreen (right  
 68 panel)-transduced A375 cells. (E) *In vitro* cytotoxicity of 1G4 TCR-T cells against the NY-  
 69 ESO-1-expressing melanoma cell line A375. 1G4 TCR-T cells were incubated with Zsgreen-  
 70 expressing A375 at an effector:target (E:T) ratio of 1:1. Green fluorescence intensity was  
 71 measured using the IncuCyte™ S3 live-cell imaging system. (F) CD4/CD8 compositions

72 (ratios) of Cas9/1G4, CD3z/1G4, and zBB/1G4 T cells. P-values (\*\*\*\*P < 0.0001) were  
73 determined using two-way ANOVA, with Tukey's multiple comparisons *post-hoc* test (E).  
74 NTD, non-transduced.



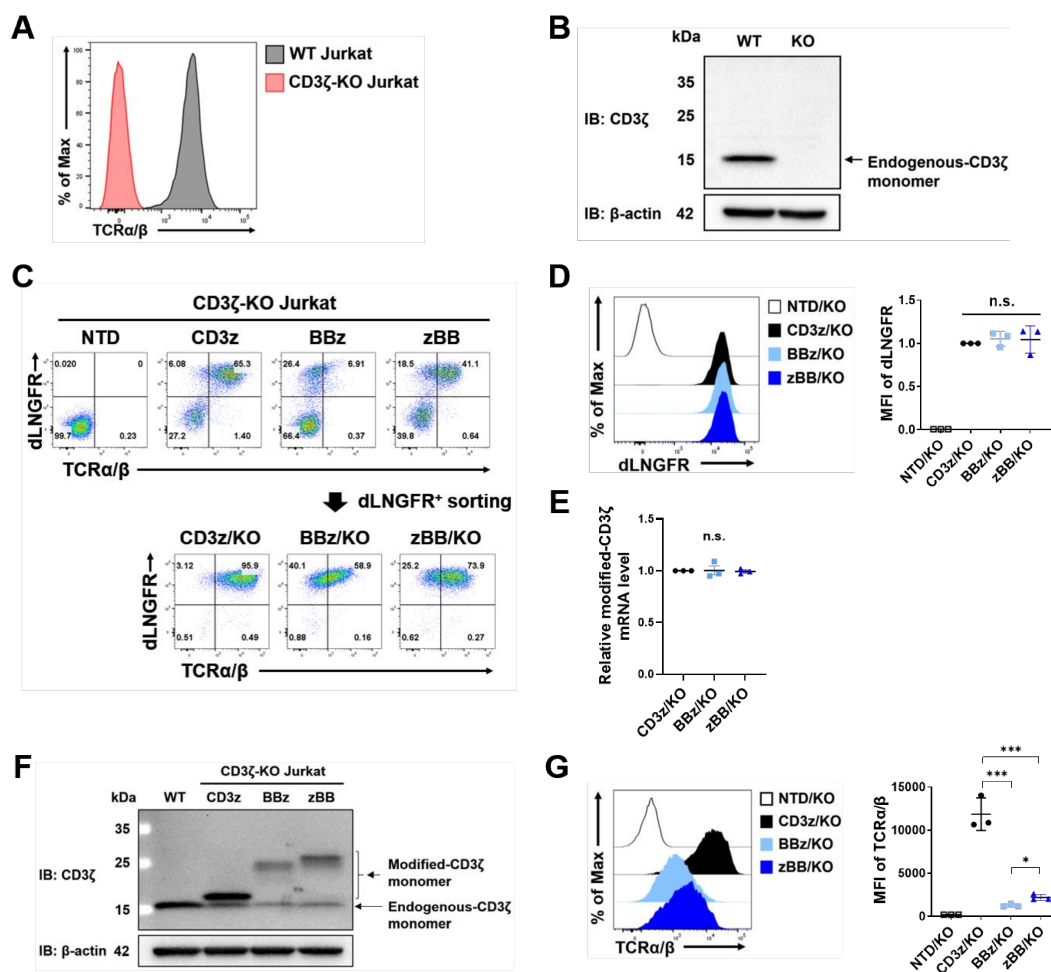

75

76 **Supplemental figure 5. Generation of BBz- or zBB-transduced CD3ζ-KO Jurkat cells.**

77 (A) Representative histograms of TCRα/β in WT (gray shaded histogram) and CD3ζ-KO (red  
78 shaded histogram) Jurkat cells. (B) Western blot analysis of endogenous-CD3ζ in WT and  
79 CD3ζ-KO Jurkat cells. β-actin was used as a loading control. Representative results from one  
80 of three repeated experiments are shown. (C) Representative flow cytometric analysis  
81 showing the proportion of dLNGFR- and TCRα/β-positive cells in CD3ζ-KO Jurkat cells  
82 expressing CD3z, BBz, or zBB, which indicate cells before (top) and after (bottom) sorting.  
83 (D) Representative histogram (left) and MFI (right) of dLNGFR in CD3z-, BBz-, and zBB-

84 transduced CD3 $\zeta$ -KO Jurkat cells from (C, bottom). (E) mRNA expression level of modified-  
85 CD3 $\zeta$  in CD3z-, BBz-, or zBB-transduced CD3 $\zeta$ -KO Jurkat cells. (F) Western blot analysis of  
86 modified-CD3 $\zeta$  in WT and CD3 $\zeta$ -KO Jurkat cells.  $\beta$ -actin was used as a loading control.  
87 Results are representative of one of two repeated experiments. (G) Representative histogram  
88 (left) and MFI (right) of the TCR $\alpha/\beta$  complex in CD3z-, BBz-, and zBB-transduced CD3 $\zeta$ -  
89 KO Jurkat cells from (C, bottom). P-values (\*P < 0.05 and \*\*\*P < 0.001) were determined  
90 using one-way ANOVA, with Tukey's multiple comparisons *post-hoc* test (D, E, and G). Data  
91 have been presented as mean  $\pm$  SEM. n.s., not significant.

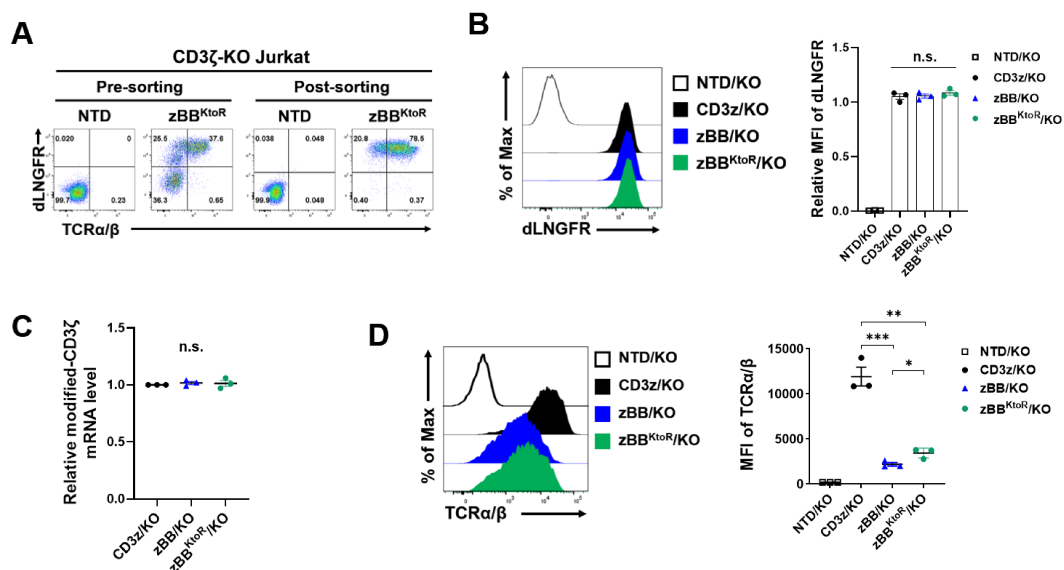

92

93 **Supplemental figure. 6 Analysis of CD3 $\zeta$ -KO Jurkat cells expressing zBB<sup>KtoR</sup>.**

94 (A) Representative flow cytometric analysis showing the proportion of dLNGFR- and  
 95 TCR $\alpha/\beta$ -positive cells in zBB<sup>KtoR</sup>-transduced CD3 $\zeta$ -KO Jurkat cells. (B) Representative  
 96 histogram (left) and MFI (right) of dLNGFR in zBB<sup>KtoR</sup>-transduced CD3 $\zeta$ -KO Jurkat cells.  
 97 (C) mRNA abundance of modified-CD3 $\zeta$  in zBB<sup>KtoR</sup>-transduced CD3 $\zeta$ -KO Jurkat cells. (D)  
 98 Representative histogram (left) and MFI (right) of TCR $\alpha/\beta$  in zBB<sup>KtoR</sup>-transduced CD3 $\zeta$ -KO  
 99 Jurkat cells. P-values (\*P < 0.05, \*\*P < 0.01, and \*\*\*P < 0.001) were determined using one-  
 100 way ANOVA, with Tukey's multiple *post-hoc* comparisons test (B-D). Data have been  
 101 presented as mean  $\pm$  SEM. n.s., not significant.

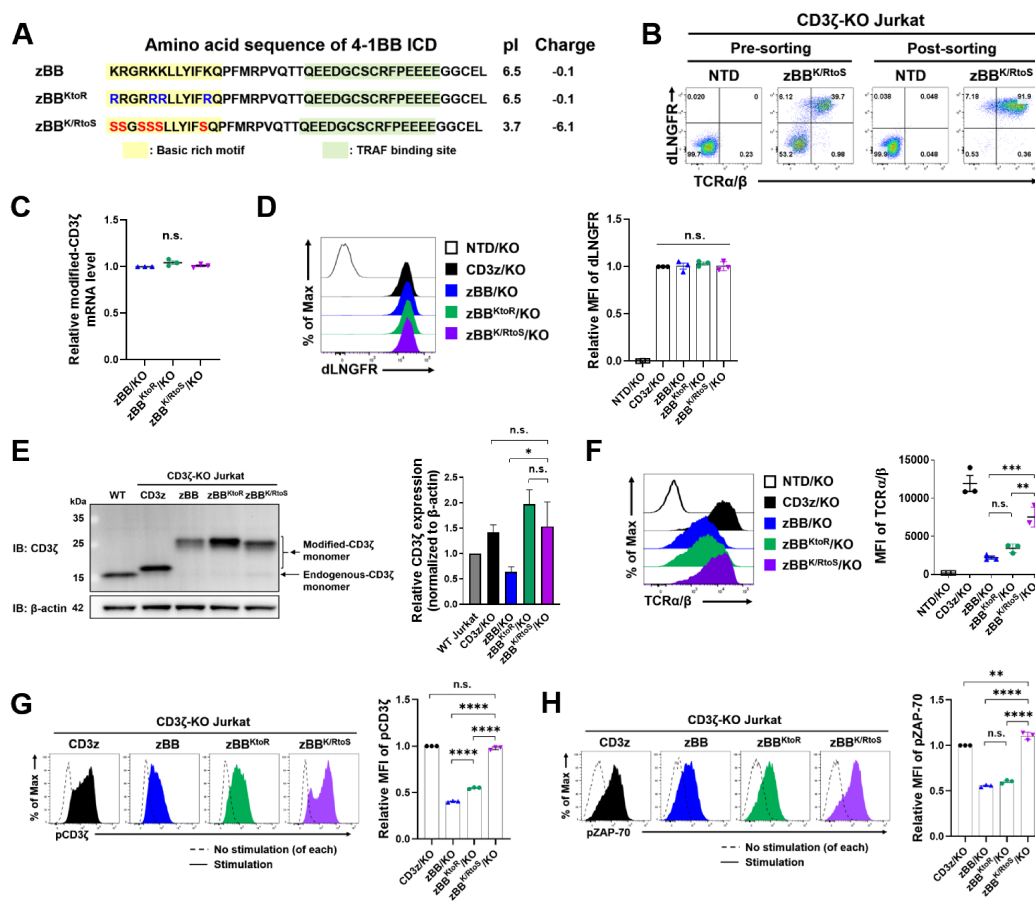

102

103 **Supplemental figure 7. The restoration of TCR signaling by substituting serine for the**  
 104 **arginine and lysine in the BRM.**

105 (A) Amino acid sequence and isoelectric point of zBB<sup>K/RtoS</sup>. (B) Representative flow  
 106 cytometric analysis of the proportion of cells positive for dLNGFR and TCR $\alpha/\beta$  in zBB<sup>K/RtoS</sup>-  
 107 expressing CD3 $\zeta$ -KO Jurkat cells. (C) mRNA abundance level of modified-CD3 $\zeta$  in  
 108 zBB<sup>K/RtoS</sup>-transduced CD3 $\zeta$ -KO Jurkat cells. (D) Representative histogram (left) and MFI  
 109 (right) of dLNGFR in zBB<sup>K/RtoS</sup>-transduced CD3 $\zeta$ -KO Jurkat cells. (E) Western blot analysis  
 110 of modified-CD3 $\zeta$  in CD3 $\zeta$ -, zBB-, zBB<sup>KtoR</sup>-, and zBB<sup>K/RtoS</sup>-transduced CD3 $\zeta$ -KO Jurkat  
 111 cells (left).  $\beta$ -actin was used as a loading control. Results are representative of one of three

112 repeated experiments. Quantification of the relative abundances of modified-CD3 $\zeta$ ,  
113 normalized to  $\beta$ -actin protein (right). (F) Representative histogram (left) and MFI (right) of  
114 TCR $\alpha/\beta$  in zBB<sup>K/RtoS</sup>-transduced CD3 $\zeta$ -KO Jurkat cells. (G) Phosphorylation of CD3 $\zeta$  in  
115 zBB<sup>K/RtoS</sup>-transduced CD3 $\zeta$ -KO Jurkat cells. (H) Phosphorylation of ZAP-70 in zBB<sup>K/RtoS</sup>-  
116 transduced CD3 $\zeta$ -KO Jurkat cells. P-values (\*P < 0.05, \*\*P < 0.01, \*\*\*P < 0.001, and \*\*\*\*P  
117 < 0.0001) were determined using one-way ANOVA, with Tukey's multiple comparisons *post-*  
118 *hoc* test (C-H). Data have been presented as mean  $\pm$  SEM. n.s., not significant.

119

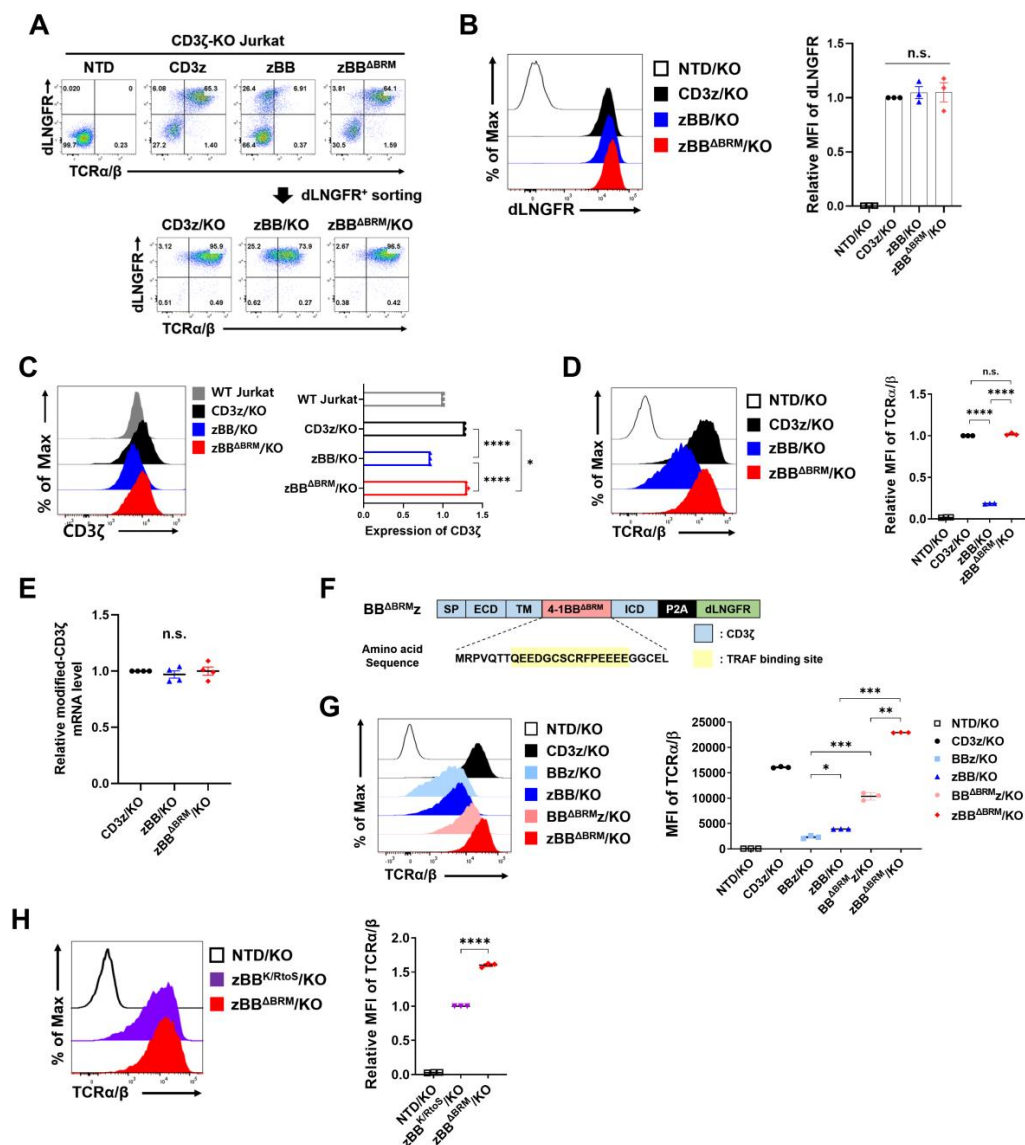

120

121 **Supplemental figure 8. Generation of zBB<sup>ABRM</sup>-transduced CD3 $\zeta$ -KO Jurkat cells.**

122 (A) Representative flow cytometric analysis of the proportion of cells positive for dLNGFR  
 123 and TCR $\alpha/\beta$  in zBB<sup>ABRM</sup>-expressing CD3 $\zeta$ -KO Jurkat cells showing the indicated cells before  
 124 (top) and after (bottom) sorting. (B) Representative histogram (left) and MFI (right) of  
 125 dLNGFR in zBB<sup>ABRM</sup>-transduced CD3 $\zeta$ -KO Jurkat cells from (A, bottom). (C) Left,

126 Histograms show the fluorescence intensity of intracellular CD3 $\zeta$ ; right, mean fluorescence  
127 intensity (MFI) of intracellular CD3 $\zeta$ . (D) Representative histogram (left) and MFI (right) of  
128 the TCR $\alpha/\beta$  complex in zBB $\Delta$ BRM-transduced CD3 $\zeta$ -KO Jurkat cells. (E) mRNA expression  
129 level of modified-CD3 $\zeta$  in zBB $\Delta$ BRM-transduced CD3 $\zeta$ -KO Jurkat cells. (F) Amino acid  
130 sequences of BB $\Delta$ BRM $_z$ . (G) Representative histogram (left) and MFI (right) of the TCR $\alpha/\beta$   
131 complex in BB $\Delta$ BRM $_z$ -transduced CD3 $\zeta$ -KO Jurkat cells. (H) Representative histogram (left)  
132 and MFI (right) of the TCR $\alpha/\beta$  complex in zBB $^{K/RtoS}$ - or zBB $\Delta$ BRM-transduced CD3 $\zeta$ -KO  
133 Jurkat cells. P-values (\*P < 0.05, \*\*P < 0.01, \*\*\*P < 0.005, and \*\*\*\*P < 0.0001) were  
134 determined using one-way ANOVA, with Tukey's multiple comparisons *post-hoc* test (B-E,  
135 G, and H). Data have been presented as mean  $\pm$  SEM. n.s., not significant.

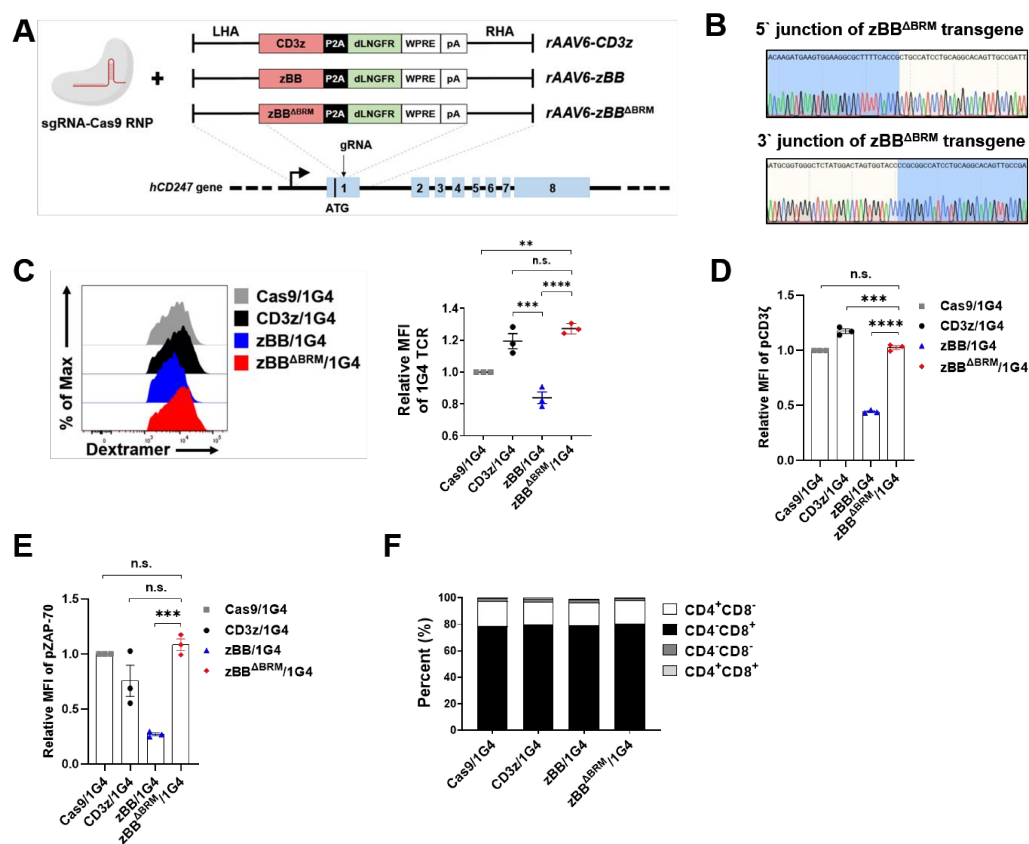

136

137 **Supplemental figure 9. Generation and analysis of zBB<sup>ABRM</sup>/1G4 T cells.**

138 (A) CRISPR/Cas9-targeted integration of the modified-CD3 $\zeta$  gene into the *CD247* locus. Top,  
 139 rAAV6 containing a modified-CD3 $\zeta$  cassette flanked by homology arms; bottom, *CD247*  
 140 locus. (B) In-Out PCR for targeted integration of zBB<sup>ABRM</sup> at *CD247* locus. (C) Surface  
 141 expression (left) and MFI (right) of the NY-ESO-1-specific TCR (1G4) complex in  
 142 zBB<sup>ABRM</sup>/1G4 T cells. (D) Phosphorylation of CD3 $\zeta$  in zBB<sup>ABRM</sup>/1G4 T cells. (E)  
 143 Phosphorylation of ZAP-70 in zBB<sup>ABRM</sup>/1G4 T cells. (F) CD4/CD8 composition (ratio) in  
 144 Cas9/1G4, CD3z/1G4, zBB/1G4, and zBB<sup>ABRM</sup>/1G4 T cells. P-values (\*\*P < 0.01, \*\*\*P <  
 145 0.001, and \*\*\*\*P < 0.0001) were determined using one-way ANOVA, with Tukey's multiple  
 146 comparisons *post-hoc* test (C-E). Data have been presented as mean  $\pm$  SEM. n.s., not



147 significant.

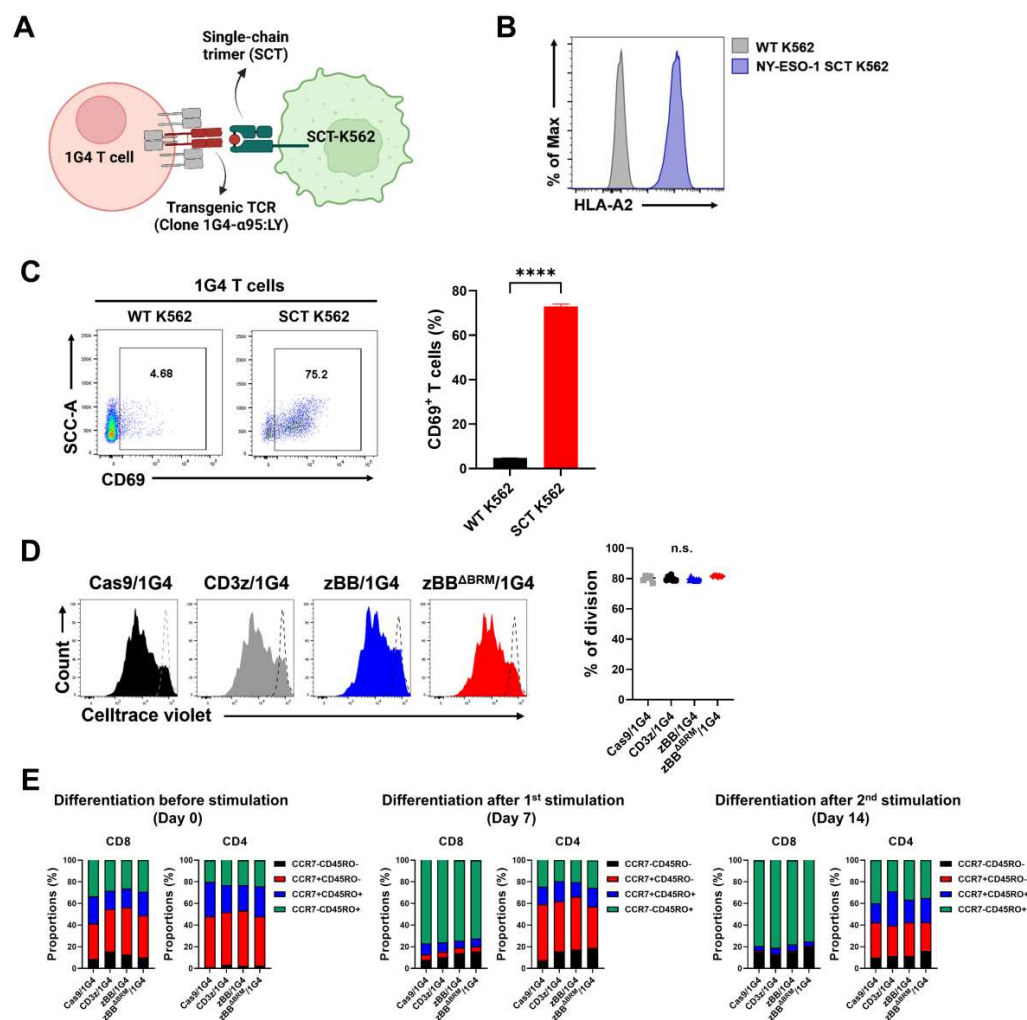

148

149 **Supplemental figure 10. Comparison of 1G4 T cells proliferation in the co-culture with**

150 **SCT-K562 feeder cells.**

151 (A) Schematic diagrams of K562 cell expressing a single-chain trimer (SCT) of HLA-A2

152 linked to the NY-ESO-1 peptide. (B) Representative histograms of HLA-A2 in WT (gray

153 shaded histogram) and NY-ESO-1-SCT (blue shaded histogram) K562 cells. (C) Proportion

154 of the activation marker, CD69, in NY-ESO-1-specific TCR-expressing T cells, after co-

155 culture with WT or SCT-K562 cells. (D) Representative FACS histogram showing  
156 proliferation of CTV-stained 1G4 T cells co-cultured with A375 cells. (E) The differentiation  
157 status of CD4<sup>+</sup> and CD8<sup>+</sup> TCR-T cells were determined by the expression of CCR7 and  
158 CD45RO. TCR-T cells were divided into naïve (CCR7<sup>+</sup>CD45RO<sup>-</sup>), central memory  
159 (CCR7<sup>+</sup>CD45RO<sup>+</sup>), effector memory (CCR7<sup>-</sup>CD45RO<sup>+</sup>), and terminally differentiated  
160 effector (CCR7<sup>-</sup>CD45RO<sup>-</sup>) subpopulations. P-values (\*\*\*\*P < 0.0001) were determined using  
161 unpaired student's *t*-test (C) and one-way ANOVA, with Tukey's multiple comparisons *post-*  
162 *hoc* test (D). Data have been presented as mean ± SEM. n.s., not significant.

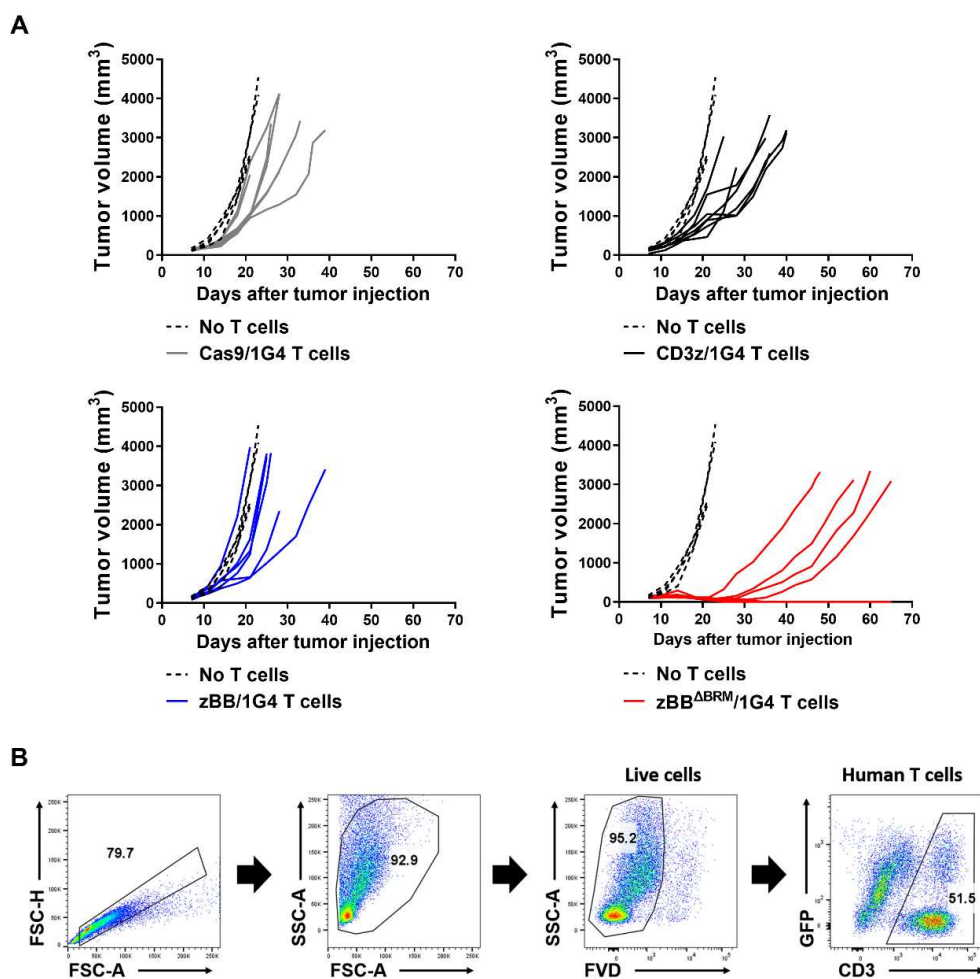

163

164 **Supplemental figure 11. Individual tumor growth curves and flow cytometry gating**  
 165 **strategy for human T cells in tumor.**

166 (A) Individual tumor growth curves for NSG mice injected with A375 melanoma cells and  
 167 intravenously infused with Cas9/1G4, CD3z/1G4, zBB/1G4, or zBB<sup>ΔBRM</sup>/1G4 T cells  
 168 ( $1 \times 10^6$  cells/mouse) when tumors reached  $\sim 100$  mm<sup>3</sup> (7 days after implantation).  
 169 Percentages of CRs: control (no T cells), 0% (0/4 mice); Cas9/1G4, 0% (0/7 mice);  
 170 CD3z/1G4, 0% (0/7 mice); zBB/1G4, 0% (0/6 mice); and zBB<sup>ΔBRM</sup>/1G4 T cell-infused, 42.9%

19

171 (3/7 mice). (B) Flow cytometry gating strategy used to define human T cell populations from  
172 A375 melanoma tumor. CR, complete remission; FVD, fixable viability dye; GFP, green  
173 fluorescent protein.

**Table1. sgRNA targeting CD247**

| sgRNA | Target | sgRNA sequence       |
|-------|--------|----------------------|
| #1    | CD247  | GCCTCCCAGCCTCTTCTGA  |
| #2    | CD247  | AAAGGACAAGATGAAGTGGA |
| #3    | CD247  | GTGGAAGGCGCTTTTACCG  |
| #4    | CD247  | CTGTGCCTGCAGGATGGCCG |

175 **Supplemental table 1. sgRNA sequences targeting the CD247 locus.**

176 **Supplementary reference**

- 177 1. Philip B, Kokalaki E, Mekkaoui L, et al. A highly compact epitope-based marker/suicide  
178 gene for easier and safer T-cell therapy. *Blood* 2014;124(8):1277-87.
